# Supplementary material for: Plastic scintillation fiber with europium complexes for low-dose X-ray detection and long-distance imaging
Source: Royal Society of Chemistry journal article supplement (doi:10.1039/d3tc03925k), 2024-01-01
Supplement: d3tc03925k1.pdf [file d3tc03925k1.pdf]

## Supporting Information for

### **Plastic scintillation fiber with europium complexes for low-dose X-ray detection and long-distance imaging**

Gang Ren<sup>a</sup>, Zhouyuanhang Wang<sup>a</sup>, Yan Kuai<sup>a</sup>, Zhigang Cao<sup>a</sup>, Feng Xu<sup>a</sup>, Yu Liu<sup>a</sup>, Kang Xie<sup>b</sup>, Siqu Li<sup>\*a</sup>, Benli Yu<sup>a</sup>, Zhijia Hu<sup>\*a</sup>

a. Information Materials and Intelligent Sensing Laboratory of Anhui Province, Key Laboratory of Opto-Electronic Information Acquisition and Manipulation of Ministry of Education, School of Physics and Optoelectronic Engineering, Anhui University, Hefei, 230601, Anhui, P. R. China

b. School of Opto-Electronic Engineering, Zaozhuang University, Zaozhuang 277160, Shandong, China

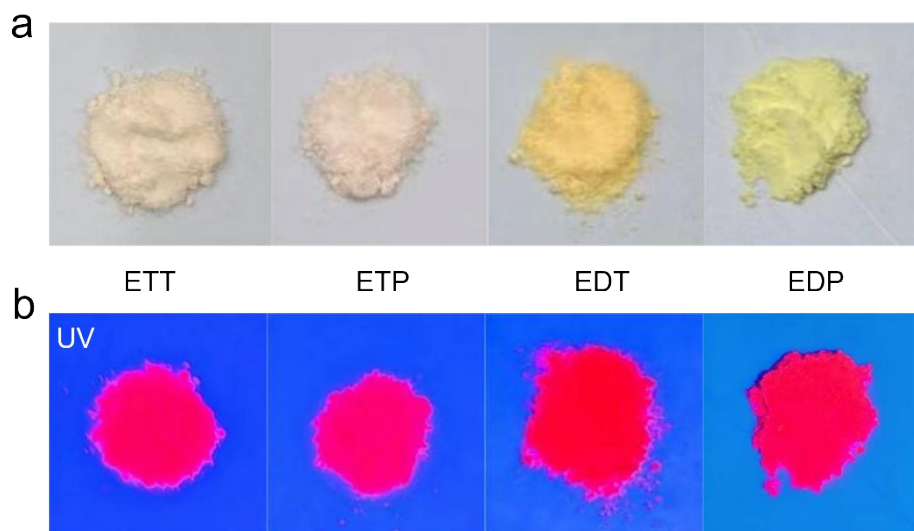

**Figure S1.** Photographs of the four complexes under natural light (a) and UV light (b).

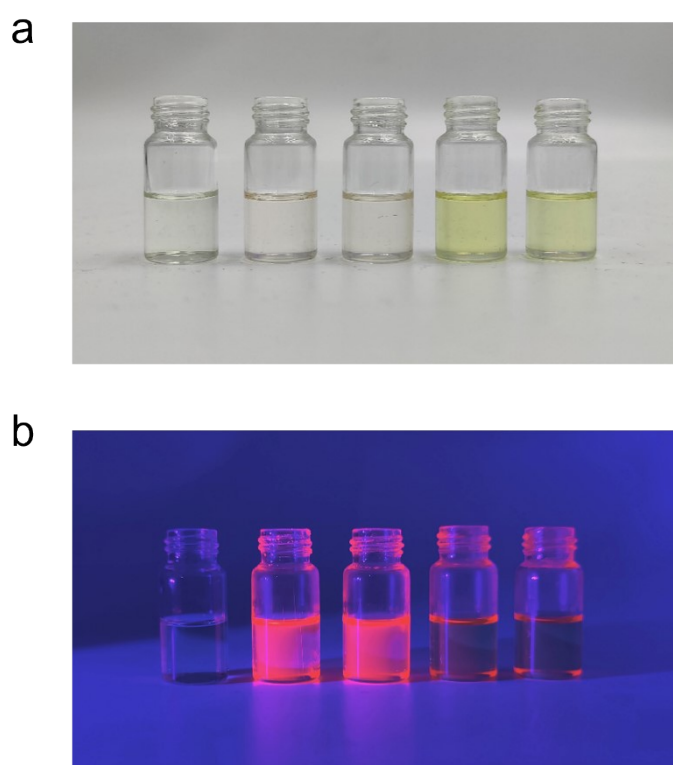

**Figure S2.** Photographs of five solutions under natural (a) and UV light (b), from left to right:  $\text{EuCl}_3$  solution, ETT solution, ETP solution, EDT solution, and EDP solution.

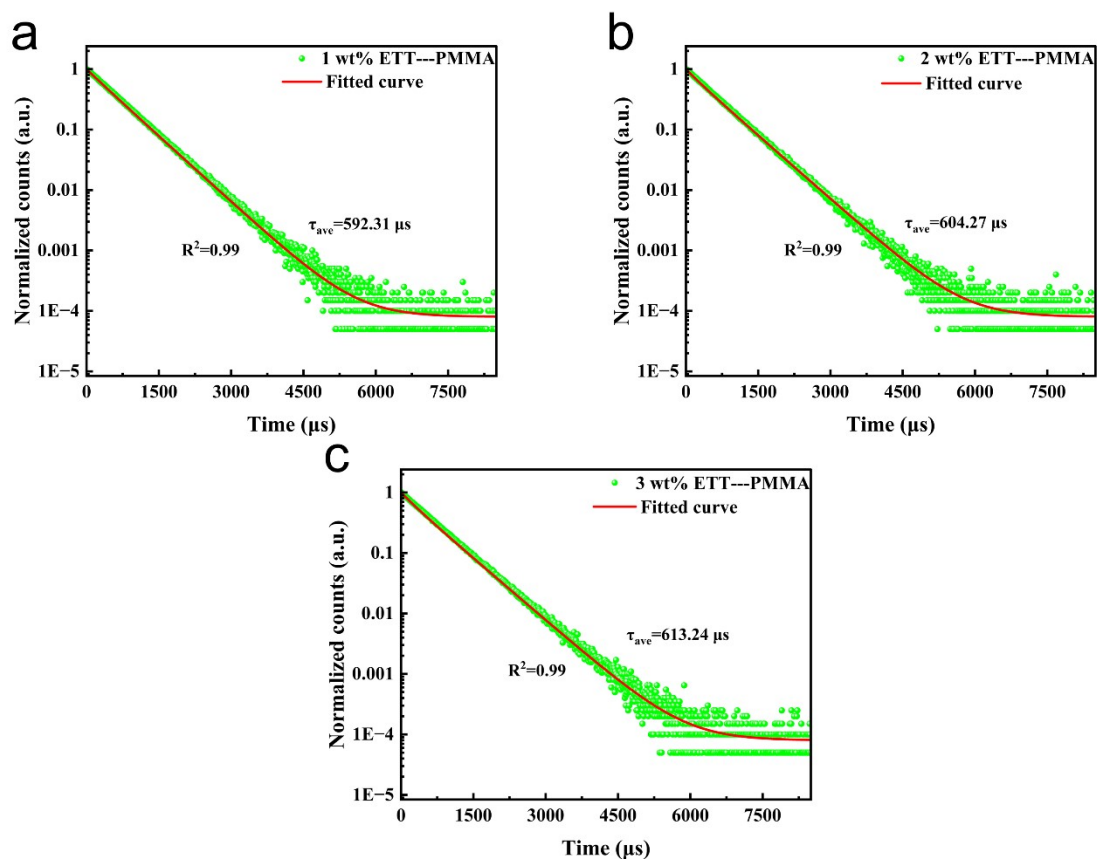

**Figure S3.** PL decay curves for 1 wt% ETT (a), 2 wt% ETT (b), and 3 wt% ETT (c) scintillators and their respective double-exponential function fit curves ( $\lambda_{\text{ex}}=367$  nm).

**Table S1.** Fitting parameters for ETT, 1 wt% ETT, 2 wt% ETT, 3 wt% ETT, 4 wt% ETT.  $\tau_1$  and  $\tau_2$ , denoting radiative and non-radiative transitions.  $A_1$  and  $A_2$  represent the weights of  $\tau_1$  and  $\tau_2$  respectively. The lifetime of the sample can be calculated using the following formula:

| Sample    | $A_1$ | $A_2$ | $\tau_1$ ( $\mu\text{s}$ ) | $\tau_2$ ( $\mu\text{s}$ ) | $\tau_{\text{avg}}$ ( $\mu\text{s}$ ) | $R^2$ |
|-----------|-------|-------|----------------------------|----------------------------|---------------------------------------|-------|
| ETT       | 0.97  | 0.03  | 560.00                     | 189.00                     | 556.17                                | 0.99  |
| 1 wt% ETT | 0.95  | 0.05  | 600.00                     | 300.00                     | 592.31                                | 0.99  |
| 2 wt% ETT | 0.90  | 0.10  | 620.00                     | 243.00                     | 604.27                                | 0.99  |
| 3 wt% ETT | 0.87  | 0.13  | 635.00                     | 267.00                     | 613.24                                | 0.99  |

|           |      |      |        |        |        |      |
|-----------|------|------|--------|--------|--------|------|
| 4 wt% ETT | 0.86 | 0.14 | 655.00 | 293.00 | 630.41 | 0.99 |
|-----------|------|------|--------|--------|--------|------|

$$\tau_{avg} = \frac{A_1\tau_1^2 + A_2\tau_2^2}{A_1\tau_1 + A_2\tau_2}$$

(1)

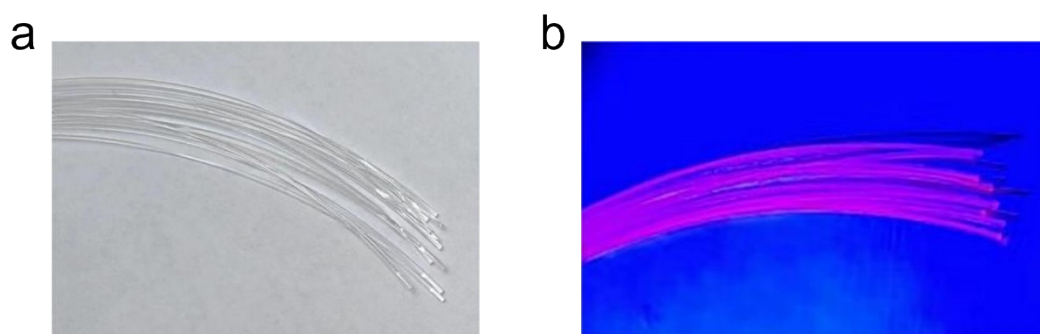

**Figure S4.** Photographs of Eu-PSF in natural (a) and UV light (b).

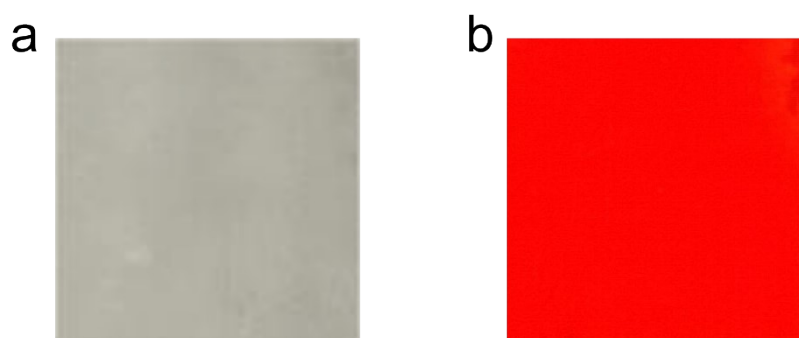

**Figure S5.** Scintillator film under natural (a) and UV light (b).

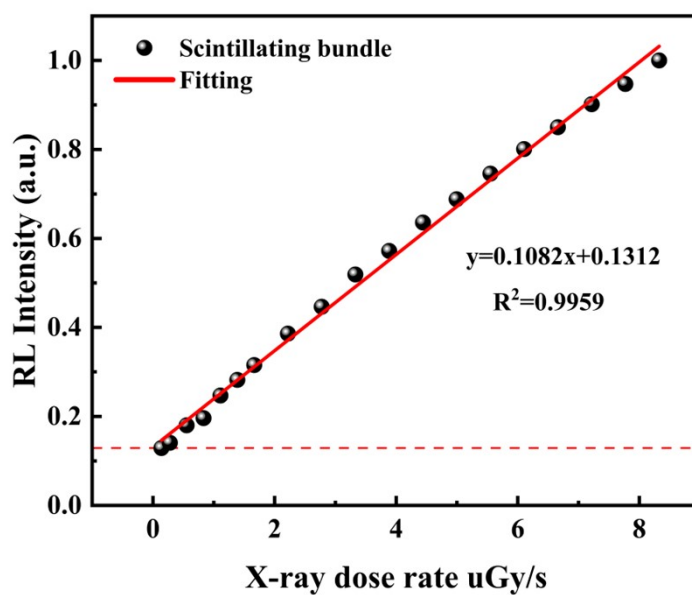

**Figure S6.** Dependence of RL intensity of scintillator membranes on X-ray dose rate.

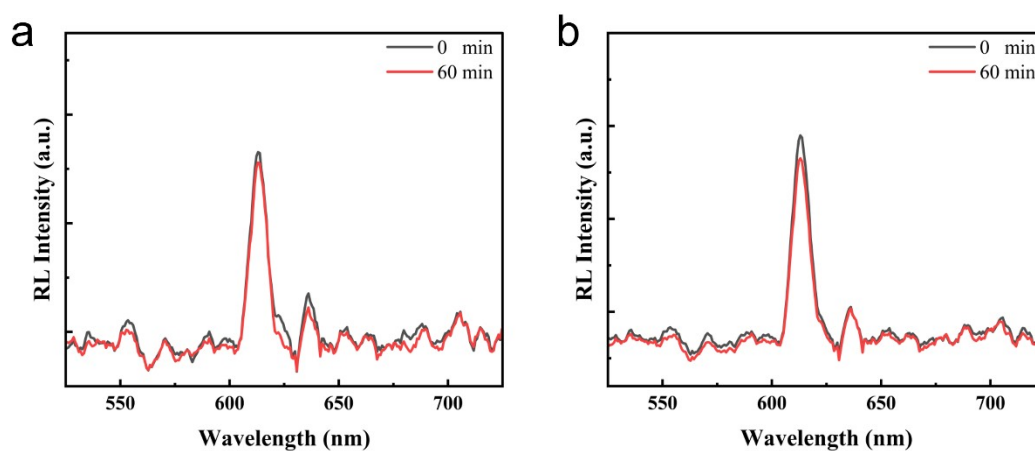

**Figure S7.** a) RL spectra of Eu-PSF for 0 min and 60 min at an X-ray dose of 0.555  $\mu\text{Gy/s}$ . b) RL spectra of Eu-PSF for 0 min and 60 min at an X-ray dose of 8.325  $\mu\text{Gy/s}$ .

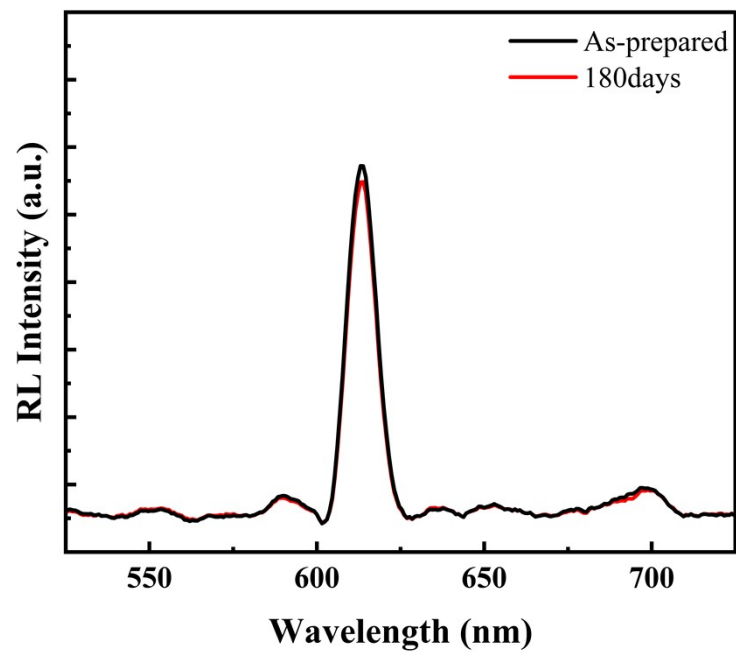

**Figure S8.** RL spectra of Eu-PSF at the start and 180 days later.

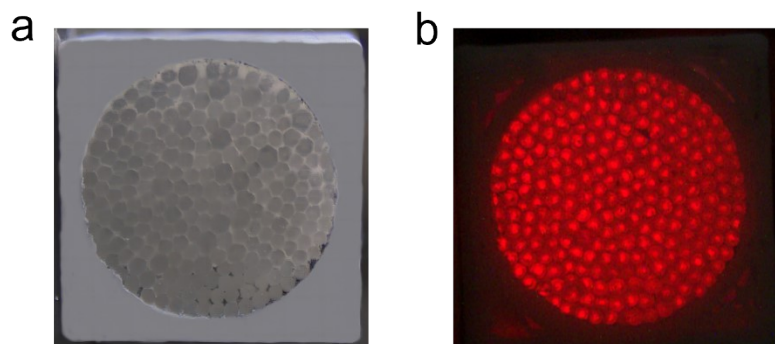

**Figure S9.** a) Photograph of fiber array. b) Fiber array under X-ray excitation.
